# Supplementary material for: LncRNA/miRNA/mRNA ceRNA network analysis in spinal cord injury rat with physical exercise therapy
Source: PeerJ. 2022 Jul 29;10:e13783. doi: 10.7717/peerj.13783 (PMC9341448; doi:10.7717/peerj.13783)
Supplement: Supplemental Information 1 [file peerj-10-13783-s006.xls]

## Sheet: Sheet1
Experiment Run End Time	2021-03-25 20:55:40 PM PDT
Instrument Type	steponeplus
Passive Reference	ROX
Well	Sample Name	Target Name	Task	Reporter	Quencher	RQ	RQ Min	RQ Max	Cт	Cт Mean	Cт SD	ΔCт	ΔCт Mean	ΔCт SE	HK Control ΔCт Mean	HK Control ΔCт SE	ΔΔCт	Automatic Ct Threshold	Ct Threshold	Automatic Baseline	Baseline Start	Baseline End	Efficiency	Tm1	Tm2	Tm3	Comments	HIGHSD	MTP
A1	Sham-1	GD	UNKNOWN	SYBR	None				14.7572	14.7003	0.111214							TRUE	0.361378	TRUE	3	9	1	82.4384				N	N
A2	Sham-1	GD	UNKNOWN	SYBR	None				14.7715	14.7003	0.111214							TRUE	0.361378	TRUE	3	10	1	82.4384				N	N
A3	Sham-1	GD	UNKNOWN	SYBR	None				14.5721	14.7003	0.111214							TRUE	0.361378	TRUE	3	9	1	82.5836				N	N
A4	Sham-2	GD	UNKNOWN	SYBR	None				15.3682	14.97	0.345318							TRUE	0.361378	TRUE	3	10	1	82.7327				N	N
A5	Sham-2	GD	UNKNOWN	SYBR	None				14.7532	14.97	0.345318							TRUE	0.361378	TRUE	3	10	1	82.4398				N	N
A6	Sham-2	GD	UNKNOWN	SYBR	None				14.7887	14.97	0.345318							TRUE	0.361378	TRUE	3	10	1	82.4398				N	N
A7	Sham-3	GD	UNKNOWN	SYBR	None				14.9508	14.9713	0.0848257							TRUE	0.361378	TRUE	3	9	1	82.4384				N	N
A8	Sham-3	GD	UNKNOWN	SYBR	None				15.0644	14.9713	0.0848257							TRUE	0.361378	TRUE	3	10	1	82.4384				N	N
A9	Sham-3	GD	UNKNOWN	SYBR	None				14.8985	14.9713	0.0848257							TRUE	0.361378	TRUE	3	10	1	82.5836				N	N
B1	SCI-1	GD	UNKNOWN	SYBR	None				14.4558	14.4459	0.0269315							TRUE	0.361378	TRUE	3	9	1	82.4372				N	N
B2	SCI-1	GD	UNKNOWN	SYBR	None				14.4154	14.4459	0.0269315							TRUE	0.361378	TRUE	3	10	1	82.2882				N	N
B3	SCI-1	GD	UNKNOWN	SYBR	None				14.4665	14.4459	0.0269315							TRUE	0.361378	TRUE	3	9	1	82.2889				N	N
B4	SCI-2	GD	UNKNOWN	SYBR	None				14.5905	14.4893	0.0979175							TRUE	0.361378	TRUE	3	10	1	82.4379				N	N
B5	SCI-2	GD	UNKNOWN	SYBR	None				14.3951	14.4893	0.0979175							TRUE	0.361378	TRUE	3	10	1	82.4406				N	N
B6	SCI-2	GD	UNKNOWN	SYBR	None				14.4822	14.4893	0.0979175							TRUE	0.361378	TRUE	3	10	1	82.5897				N	N
B7	SCI-3	GD	UNKNOWN	SYBR	None				15.3135	15.1039	0.188069							TRUE	0.361378	TRUE	3	10	1	82.4384				N	N
B8	SCI-3	GD	UNKNOWN	SYBR	None				15.0483	15.1039	0.188069							TRUE	0.361378	TRUE	3	9	1	82.4384				N	N
B9	SCI-3	GD	UNKNOWN	SYBR	None				14.9499	15.1039	0.188069							TRUE	0.361378	TRUE	3	9	1	82.5836				N	N
C1	SCI+TMT-1	GD	UNKNOWN	SYBR	None				14.9067	14.8874	0.032914							TRUE	0.361378	TRUE	3	10	1	82.4372				N	N
C2	SCI+TMT-1	GD	UNKNOWN	SYBR	None				14.8494	14.8874	0.032914							TRUE	0.361378	TRUE	3	10	1	82.4372				N	N
C3	SCI+TMT-1	GD	UNKNOWN	SYBR	None				14.9062	14.8874	0.032914							TRUE	0.361378	TRUE	3	10	1	82.4379				N	N
C4	SCI+TMT-2	GD	UNKNOWN	SYBR	None				15.063	14.9293	0.122639							TRUE	0.361378	TRUE	3	10	1	82.4379				N	N
C5	SCI+TMT-2	GD	UNKNOWN	SYBR	None				14.9027	14.9293	0.122639							TRUE	0.361378	TRUE	3	9	1	82.4406				N	N
C6	SCI+TMT-2	GD	UNKNOWN	SYBR	None				14.8221	14.9293	0.122639							TRUE	0.361378	TRUE	3	10	1	82.4406				N	N
C7	SCI+TMT-3	GD	UNKNOWN	SYBR	None				14.9371	14.6795	0.233219							TRUE	0.361378	TRUE	3	10	1	82.5836				N	N
C8	SCI+TMT-3	GD	UNKNOWN	SYBR	None				14.4826	14.6795	0.233219							TRUE	0.361378	TRUE	3	10	1	82.4398				N	N
C9	SCI+TMT-3	GD	UNKNOWN	SYBR	None				14.6188	14.6795	0.233219							TRUE	0.361378	TRUE	3	10	1	82.4398				N	N
D1	Sham-1	BDNF	UNKNOWN	SYBR	None	1.15493	0.779395	1.71142	24.7433	24.678	0.0777155		9.70794	0.204356			-0.20781	TRUE	0.430165	TRUE	3	19	1	81.9907				N	N
D2	Sham-1	BDNF	UNKNOWN	SYBR	None	1.15493	0.779395	1.71142	24.592	24.678	0.0777155		9.70794	0.204356			-0.20781	TRUE	0.430165	TRUE	3	19	1	81.9933				N	N
D3	Sham-1	BDNF	UNKNOWN	SYBR	None	1.15493	0.779395	1.71142	24.6986	24.678	0.0777155		9.70794	0.204356			-0.20781	TRUE	0.430165	TRUE	3	19	1	81.9933				N	N
D4	Sham-2	BDNF	UNKNOWN	SYBR	None	1	0.827606	1.2083	24.7607	24.616	0.128968		9.91575	0.0983213			0	TRUE	0.430165	TRUE	3	19	1	81.99				N	N
D5	Sham-2	BDNF	UNKNOWN	SYBR	None	1	0.827606	1.2083	24.5741	24.616	0.128968		9.91575	0.0983213			0	TRUE	0.430165	TRUE	3	19	1	81.99				N	N
D6	Sham-2	BDNF	UNKNOWN	SYBR	None	1	0.827606	1.2083	24.5132	24.616	0.128968		9.91575	0.0983213			0	TRUE	0.430165	TRUE	3	18	1	81.9907				N	N
D7	Sham-3	BDNF	UNKNOWN	SYBR	None	1.09444	0.973398	1.23052	24.7029	24.7568	0.0626979		9.78556	0.0609			-0.130187	TRUE	0.430165	TRUE	3	18	1	81.99				N	N
D8	Sham-3	BDNF	UNKNOWN	SYBR	None	1.09444	0.973398	1.23052	24.742	24.7568	0.0626979		9.78556	0.0609			-0.130187	TRUE	0.430165	TRUE	3	19	1	81.99				N	N
D9	Sham-3	BDNF	UNKNOWN	SYBR	None	1.09444	0.973398	1.23052	24.8256	24.7568	0.0626979		9.78556	0.0609			-0.130187	TRUE	0.430165	TRUE	3	18	1	82.1398				N	N
E1	SCI-1	BDNF	UNKNOWN	SYBR	None	1.52202	1.31456	1.76221	24.2173	24.2391	0.0484999		9.30977	0.0761416			-0.605984	TRUE	0.430165	TRUE	3	18	1	82.1364				N	N
E2	SCI-1	BDNF	UNKNOWN	SYBR	None	1.52202	1.31456	1.76221	24.2053	24.2391	0.0484999		9.30977	0.0761416			-0.605984	TRUE	0.430165	TRUE	3	18	1	82.1417				N	N
E3	SCI-1	BDNF	UNKNOWN	SYBR	None	1.52202	1.31456	1.76221	24.2946	24.2391	0.0484999		9.30977	0.0761416			-0.605984	TRUE	0.430165	TRUE	3	18	1	82.1417				N	N
E4	SCI-2	BDNF	UNKNOWN	SYBR	None	1.29551	1.12887	1.48675	24.3624	24.4297	0.11947		9.54223	0.0715459			-0.373521	TRUE	0.430165	TRUE	3	18	1	82.1402				N	N
E5	SCI-2	BDNF	UNKNOWN	SYBR	None	1.29551	1.12887	1.48675	24.5676	24.4297	0.11947		9.54223	0.0715459			-0.373521	TRUE	0.430165	TRUE	3	19	1	82.1402				N	N
E6	SCI-2	BDNF	UNKNOWN	SYBR	None	1.29551	1.12887	1.48675	24.359	24.4297	0.11947		9.54223	0.0715459			-0.373521	TRUE	0.430165	TRUE	3	18	1	82.1364				N	N
E7	SCI-3	BDNF	UNKNOWN	SYBR	None	1.1389	0.891935	1.45423	24.9467	24.832	0.114113		9.72812	0.127006			-0.187635	TRUE	0.430165	TRUE	3	19	1	82.1391				N	N
E8	SCI-3	BDNF	UNKNOWN	SYBR	None	1.1389	0.891935	1.45423	24.7185	24.832	0.114113		9.72812	0.127006			-0.187635	TRUE	0.430165	TRUE	3	19	1	81.99				N	N
E9	SCI-3	BDNF	UNKNOWN	SYBR	None	1.1389	0.891935	1.45423	24.8309	24.832	0.114113		9.72812	0.127006			-0.187635	TRUE	0.430165	TRUE	3	19	1	81.9907				N	N
F1	SCI+TMT-1	BDNF	UNKNOWN	SYBR	None	1.43048	0.806886	2.53602	23.8053	23.8885	0.505943		9.39925	0.297526			-0.516503	TRUE	0.430165	TRUE	3	18	1	82.1364				Y	N
F2	SCI+TMT-1	BDNF	UNKNOWN	SYBR	None	1.43048	0.806886	2.53602	24.4309	23.8885	0.505943		9.39925	0.297526			-0.516503	TRUE	0.430165	TRUE	3	18	1	82.1417				Y	N
F3	SCI+TMT-1	BDNF	UNKNOWN	SYBR	None	1.43048	0.806886	2.53602	23.4293	23.8885	0.505943		9.39925	0.297526			-0.516503	TRUE	0.430165	TRUE	3	18	1	82.1417				Y	N
F4	SCI+TMT-2	BDNF	UNKNOWN	SYBR	None	1.28789	1.16081	1.42888	23.9253	23.9967	0.0895364		9.55075	0.0539817			-0.365004	TRUE	0.430165	TRUE	3	18	1	81.9912				N	N
F5	SCI+TMT-2	BDNF	UNKNOWN	SYBR	None	1.28789	1.16081	1.42888	24.0971	23.9967	0.0895364		9.55075	0.0539817			-0.365004	TRUE	0.430165	TRUE	3	18	1	82.1402				N	N
F6	SCI+TMT-2	BDNF	UNKNOWN	SYBR	None	1.28789	1.16081	1.42888	23.9676	23.9967	0.0895364		9.55075	0.0539817			-0.365004	TRUE	0.430165	TRUE	3	18	1	82.1364				N	N
F7	SCI+TMT-3	BDNF	UNKNOWN	SYBR	None	1.35729	1.03335	1.78279	24.2415	24.1545	0.0764237		9.47502	0.141694			-0.44073	TRUE	0.430165	TRUE	3	18	1	81.9907				N	N
F8	SCI+TMT-3	BDNF	UNKNOWN	SYBR	None	1.35729	1.03335	1.78279	24.0982	24.1545	0.0764237		9.47502	0.141694			-0.44073	TRUE	0.430165	TRUE	3	18	1	81.9933				N	N
F9	SCI+TMT-3	BDNF	UNKNOWN	SYBR	None	1.35729	1.03335	1.78279	24.1238	24.1545	0.0764237		9.47502	0.141694			-0.44073	TRUE	0.430165	TRUE	3	18	1	81.9933				N	N
Analysis Type	Singleplex
Endogenous Control	GD
RQ Min/Max Confidence Level	95.0
Reference Sample	A2
								14.97	24.616	9.646	1
								14.4893	24.4297	9.94041	0.815408
								14.9293	23.9967	9.02664	1.5362
