# Supplementary material for: LncRNA/miRNA/mRNA ceRNA network analysis in spinal cord injury rat with physical exercise therapy
Source: PeerJ. 2022 Jul 29;10:e13783. doi: 10.7717/peerj.13783 (PMC9341448; doi:10.7717/peerj.13783)
Supplement: Supplemental Information 2 [file peerj-10-13783-s007.xlsx]

## Sheet: 1
Block Type	96well
Chemistry	SYBR_GREEN
Experiment File Name	D:\HWH\20210322.eds
Experiment Run End Time	2021-03-23 19:43:27 PM PDT
Instrument Type	steponeplus
Passive Reference	ROX
Well	Sample Name	Target Name	Task	Reporter	Quencher	RQ	RQ Min	RQ Max	Cт	Cт Mean	Cт SD	ΔCт	ΔCт Mean	ΔCт SE	HK Control ΔCт Mean	HK Control ΔCт SE	ΔΔCт	Automatic Ct Threshold	Ct Threshold	Automatic Baseline	Baseline Start	Baseline End	Efficiency	Tm1	Tm2	Tm3	Comments	HIGHSD	OUTLIERRG	MTP
A1	Sham	GD	UNKNOWN	SYBR	None				14.9688	15.0921	0.129502							TRUE	0.518476	TRUE	3	9	1	82.588				N	N	N
A2	Sham	GD	UNKNOWN	SYBR	None				15.227	15.0921	0.129502							TRUE	0.518476	TRUE	3	5	1	82.588				N	N	N
A3	Sham	GD	UNKNOWN	SYBR	None				15.0805	15.0921	0.129502							TRUE	0.518476	TRUE	3	10	1	82.7363				N	N	N
A4	SCI	GD	UNKNOWN	SYBR	None				18.0151	17.7905	0.324874							TRUE	0.518476	TRUE	3	12	1	82.7363				N	N	N
A5	SCI	GD	UNKNOWN	SYBR	None				17.9384	17.7905	0.324874							TRUE	0.518476	TRUE	3	13	1	82.5896				N	N	N
A6	SCI	GD	UNKNOWN	SYBR	None				17.418	17.7905	0.324874							TRUE	0.518476	TRUE	3	12	1	82.5896				N	N	N
A7	SCI+TMT	GD	UNKNOWN	SYBR	None				14.9831	14.8878	0.128219							TRUE	0.518476	TRUE	3	9	1	82.588				N	N	N
A8	SCI+TMT	GD	UNKNOWN	SYBR	None				14.9384	14.8878	0.128219							TRUE	0.518476	TRUE	3	10	1	82.5872				N	N	N
A9	SCI+TMT	GD	UNKNOWN	SYBR	None				14.742	14.8878	0.128219							TRUE	0.518476	TRUE	3	10	1	82.7363				N	N	N
B1	Sham	TNF	UNKNOWN	SYBR	None	1	0.684454	1.46102	28.0203	28.371	0.315694		13.2788	0.197005			0	TRUE	0.503742	TRUE	3	23	1	83.1848				N	N	N
B2	Sham	TNF	UNKNOWN	SYBR	None	1	0.684454	1.46102	28.6325	28.371	0.315694		13.2788	0.197005			0	TRUE	0.503742	TRUE	3	22	1	83.1843				N	N	N
B3	Sham	TNF	UNKNOWN	SYBR	None	1	0.684454	1.46102	28.4601	28.371	0.315694		13.2788	0.197005			0	TRUE	0.503742	TRUE	3	23	1	83.1843				N	N	N
B4	SCI	TNF	UNKNOWN	SYBR	None	7.22434	4.7774	10.9246	28.4099	28.2165	0.181644		10.426	0.214894			-2.85287	TRUE	0.503742	TRUE	3	23	1	83.3326				N	N	N
B5	SCI	TNF	UNKNOWN	SYBR	None	7.22434	4.7774	10.9246	28.19	28.2165	0.181644		10.426	0.214894			-2.85287	TRUE	0.503742	TRUE	3	23	1	83.4817				N	N	N
B6	SCI	TNF	UNKNOWN	SYBR	None	7.22434	4.7774	10.9246	28.0495	28.2165	0.181644		10.426	0.214894			-2.85287	TRUE	0.503742	TRUE	3	22	1	83.1857				N	N	N
C7	SCI+TMT	TNF	UNKNOWN	SYBR	None	1.06955	0.711558	1.60766	27.0918	27.4586	0.343648		12.5707	0.211766			-0.0970087	TRUE	0.567785	TRUE	3	21	1	77.6694	84.2283			N	N	Y
C8	SCI+TMT	TNF	UNKNOWN	SYBR	None	1.06955	0.711558	1.60766	27.7732	27.4586	0.343648		12.5707	0.211766			-0.0970087	TRUE	0.567785	TRUE	3	22	1	77.8179	84.2278			N	N	Y
C9	SCI+TMT	TNF	UNKNOWN	SYBR	None	1.06955	0.711558	1.60766	27.5107	27.4586	0.343648		12.5707	0.211766			-0.0970087	TRUE	0.567785	TRUE	3	22	1	77.8179	84.2278			N	N	Y
C1	Sham	IL-6	UNKNOWN	SYBR	None	1	0.77169	1.29586	27.9448	27.7599	0.194005		12.6677	0.134671			0	TRUE	0.567785	TRUE	3	22	1	77.6694	84.0792			N	N	Y
C2	Sham	IL-6	UNKNOWN	SYBR	None	1	0.77169	1.29586	27.5579	27.7599	0.194005		12.6677	0.134671			0	TRUE	0.567785	TRUE	3	22	1	77.6694	84.0792			N	N	Y
C3	Sham	IL-6	UNKNOWN	SYBR	None	1	0.77169	1.29586	27.7768	27.7599	0.194005		12.6677	0.134671			0	TRUE	0.567785	TRUE	3	22	1	77.8179	84.2278			N	N	Y
C4	SCI	IL-6	UNKNOWN	SYBR	None	9.40592	6.4472	13.7224	27.3385	27.2247	0.100035		9.43417	0.196257			-3.23357	TRUE	0.567785	TRUE	3	22	1	77.8179	84.5259			N	N	Y
C5	SCI	IL-6	UNKNOWN	SYBR	None	9.40592	6.4472	13.7224	27.1851	27.2247	0.100035		9.43417	0.196257			-3.23357	TRUE	0.567785	TRUE	3	22	1	77.9657				N	N	N
C6	SCI	IL-6	UNKNOWN	SYBR	None	9.40592	6.4472	13.7224	27.1505	27.2247	0.100035		9.43417	0.196257			-3.23357	TRUE	0.567785	TRUE	3	21	1	77.9657				N	N	N
C7	SCI+TMT	IL-6	UNKNOWN	SYBR	None	1.37021	1.0572	1.77589	27.895	27.7123	0.195034		12.8244	0.134757			-0.454394	TRUE	0.503742	TRUE	3	22	1	83.0352				N	N	N
C8	SCI+TMT	IL-6	UNKNOWN	SYBR	None	1.37021	1.0572	1.77589	27.735	27.7123	0.195034		12.8244	0.134757			-0.454394	TRUE	0.503742	TRUE	3	22	1	83.0352				N	N	N
C9	SCI+TMT	IL-6	UNKNOWN	SYBR	None	1.37021	1.0572	1.77589	27.5069	27.7123	0.195034		12.8244	0.134757			-0.454394	TRUE	0.503742	TRUE	3	22	1	83.1835				N	N	N
D1	Sham	IL-1B	UNKNOWN	SYBR	None	1	0.000734685	1361.13	25.6784	29.388	6.48715		13.91	3.74961			0	TRUE	0.247775	TRUE	3	20	1	82.7411				Y	N
D2	Sham	IL-1B	UNKNOWN	SYBR	None	1	0.000734685	1361.13	25.607	29.388	6.48715		13.91	3.74961			0	TRUE	0.247775	TRUE	3	21	1	82.7411				Y	N
D3	Sham	IL-1B	UNKNOWN	SYBR	None	1	0.000734685	1361.13	36.8786	29.388	6.48715		13.91	3.74961			0	TRUE	0.247775	TRUE	3	32	1	87.358				Y	Y
D4	SCI	IL-1B	UNKNOWN	SYBR	None	5.70523	4.04252	8.05183	28.9628	28.7844	0.288665		13.8268	0.179017			-2.51229	TRUE	0.387263	TRUE	3	24	1	82.4346				N	N
D5	SCI	IL-1B	UNKNOWN	SYBR	None	5.70523	4.04252	8.05183	28.939	28.7844	0.288665		13.8268	0.179017			-2.51229	TRUE	0.387263	TRUE	3	24	1	82.4398				N	N
D6	SCI	IL-1B	UNKNOWN	SYBR	None	5.70523	4.04252	8.05183	28.4514	28.7844	0.288665		13.8268	0.179017			-2.51229	TRUE	0.387263	TRUE	3	24	1	82.4398				N	N
D7	SCI+TMT	IL-1B	UNKNOWN	SYBR	None	1.46954	0.804292	2.68503	27.9975	28.2223	0.332336		12.1124	0.313197			-0.555364	TRUE	0.567785	TRUE	3	23	1	77.8206	84.2289			N	N	Y
D8	SCI+TMT	IL-1B	UNKNOWN	SYBR	None	1.46954	0.804292	2.68503	28.6041	28.2223	0.332336		12.1124	0.313197			-0.555364	TRUE	0.567785	TRUE	3	23	1	77.8206				N	N	N
D9	SCI+TMT	IL-1B	UNKNOWN	SYBR	None	1.46954	0.804292	2.68503	28.0655	28.2223	0.332336		12.1124	0.313197			-0.555364	TRUE	0.567785	TRUE	3	23	1	77.8185	84.0792			N	N	Y
Analysis Type	Singleplex
Endogenous Control	GD
RQ Min/Max Confidence Level	95.0
Reference Sample	CK

## Sheet: 2
Instrument Type	steponeplus
Passive Reference	ROX
Well	Sample Name	Target Name	Task	Reporter	Quencher	RQ	RQ Min	RQ Max	Cт	Cт Mean	Cт SD	ΔCт	ΔCт Mean	ΔCт SE	HK Control ΔCт Mean	HK Control ΔCт SE	ΔΔCт	Automatic Ct Threshold	Ct Threshold	Automatic Baseline	Baseline Start	Baseline End	Efficiency	Tm1	Tm2	Tm3	Comments	HIGHSD	OUTLIERRG
A1	Sham	GD	UNKNOWN	SYBR	None				15.7196	15.478	0.309181							TRUE	0.474324	TRUE	3	9	1	82.2939				N	N
A2	Sham	GD	UNKNOWN	SYBR	None				15.5848	15.478	0.309181							TRUE	0.474324	TRUE	3	10	1	82.2939				N	N
A3	Sham	GD	UNKNOWN	SYBR	None				15.1296	15.478	0.309181							TRUE	0.474324	TRUE	3	10	1	82.4395				N	N
A4	SCI	GD	UNKNOWN	SYBR	None				15.3391	14.8577	0.416948							TRUE	0.474324	TRUE	3	9	1	82.5886				N	Y
A5	SCI	GD	UNKNOWN	SYBR	None				14.6157	14.8577	0.416948							TRUE	0.474324	TRUE	3	9	1	82.2976				N	N
A6	SCI	GD	UNKNOWN	SYBR	None				14.6181	14.8577	0.416948							TRUE	0.474324	TRUE	3	9	1	82.2976				N	N
A7	SCI+TMT	GD	UNKNOWN	SYBR	None				14.8035	14.8387	0.0686338							TRUE	0.474324	TRUE	3	9	1	82.2957				N	N
A8	SCI+TMT	GD	UNKNOWN	SYBR	None				14.9178	14.8387	0.0686338							TRUE	0.474324	TRUE	3	9	1	82.2957				N	N
A9	SCI+TMT	GD	UNKNOWN	SYBR	None				14.7948	14.8387	0.0686338							TRUE	0.474324	TRUE	3	9	1	82.2964				N	N
B1	Sham	TNF	UNKNOWN	SYBR	None	1	0.673265	1.4853	27.7789	27.5938	0.176589		12.1158	0.20557			0	TRUE	0.387145	TRUE	3	21	1	82.7428				N	N
B2	Sham	TNF	UNKNOWN	SYBR	None	1	0.673265	1.4853	27.4271	27.5938	0.176589		12.1158	0.20557			0	TRUE	0.387145	TRUE	3	22	1	82.7428				N	N
B3	Sham	TNF	UNKNOWN	SYBR	None	1	0.673265	1.4853	27.5753	27.5938	0.176589		12.1158	0.20557			0	TRUE	0.387145	TRUE	3	22	1	82.8925				N	N
B4	SCI	TNF	UNKNOWN	SYBR	None	19.5496	13.3432	28.643	24.7205	24.3695	0.306155		9.62097	0.19847			-4.28907	TRUE	0.247775	TRUE	3	20	1	82.7434				N	N
B5	SCI	TNF	UNKNOWN	SYBR	None	19.5496	13.3432	28.643	24.1574	24.3695	0.306155		9.62097	0.19847			-4.28907	TRUE	0.247775	TRUE	3	20	1	82.8937				N	N
B6	SCI	TNF	UNKNOWN	SYBR	None	19.5496	13.3432	28.643	24.2307	24.3695	0.306155		9.62097	0.19847			-4.28907	TRUE	0.247775	TRUE	3	19	1	82.7446				N	N
C7	SCI+TMT	TNF	UNKNOWN	SYBR	None	0.803452	0.74291	0.868928	27.286	27.2702	0.0161545		12.4315	0.0407086			0.315716	TRUE	0.387145	TRUE	3	22	1	82.8901				N	N
C8	SCI+TMT	TNF	UNKNOWN	SYBR	None	0.803452	0.74291	0.868928	27.2538	27.2702	0.0161545		12.4315	0.0407086			0.315716	TRUE	0.387145	TRUE	3	22	1	82.8901				N	N
C9	SCI+TMT	TNF	UNKNOWN	SYBR	None	0.803452	0.74291	0.868928	27.2708	27.2702	0.0161545		12.4315	0.0407086			0.315716	TRUE	0.387145	TRUE	3	22	1	83.0357				N	N
C1	Sham	IL-6	UNKNOWN	SYBR	None	5.5673	1.99495	15.5367	27.7931	26.9118	0.818132		10.8019	0.533282			-2.47698	TRUE	0.503742	TRUE	3	22	1	83.4838				Y	N	N
C2	Sham	IL-6	UNKNOWN	SYBR	None	5.5673	1.99495	15.5367	26.7657	26.9118	0.818132		10.8019	0.533282			-2.47698	TRUE	0.503742	TRUE	3	22	1	83.1848				Y	N	N
C3	Sham	IL-6	UNKNOWN	SYBR	None	5.5673	1.99495	15.5367	26.1766	26.9118	0.818132		10.8019	0.533282			-2.47698	TRUE	0.503742	TRUE	3	20	1	83.3339				Y	N	N
F7	SCI	IL-6	UNKNOWN	SYBR	None	24.9789	22.104	28.2278	24.1585	24.1061	0.0860241		9.2674	0.0635367			-4.64264	TRUE	0.247775	TRUE	3	19	1	82.7428				N	N
F8	SCI	IL-6	UNKNOWN	SYBR	None	24.9789	22.104	28.2278	24.0068	24.1061	0.0860241		9.2674	0.0635367			-4.64264	TRUE	0.247775	TRUE	3	19	1	82.7428				N	N
F9	SCI	IL-6	UNKNOWN	SYBR	None	24.9789	22.104	28.2278	24.153	24.1061	0.0860241		9.2674	0.0635367			-4.64264	TRUE	0.247775	TRUE	3	18	1	82.7434				N	N
C4	SCI+TMT	IL-6	UNKNOWN	SYBR	None	4.12435	2.69556	6.31046	25.8205	25.5458	0.254063		11.2347	0.220995			-2.04417	TRUE	0.503742	TRUE	3	21	1	83.4817				N	N	N
C5	SCI+TMT	IL-6	UNKNOWN	SYBR	None	4.12435	2.69556	6.31046	25.4977	25.5458	0.254063		11.2347	0.220995			-2.04417	TRUE	0.503742	TRUE	3	20	1	83.3348				N	N	N
C6	SCI+TMT	IL-6	UNKNOWN	SYBR	None	4.12435	2.69556	6.31046	25.3193	25.5458	0.254063		11.2347	0.220995			-2.04417	TRUE	0.503742	TRUE	3	20	1	83.3348				N	N	N
D1	Sham	IL-1B	UNKNOWN	SYBR	None	1.50748	1.07776	2.10853	26.3703	26.3868	0.0960983		12.0756	0.174359			-0.592137	TRUE	0.567785	TRUE	3	21	1	77.8166	84.3761			N	N	Y
D2	Sham	IL-1B	UNKNOWN	SYBR	None	1.50748	1.07776	2.10853	26.49	26.3868	0.0960983		12.0756	0.174359			-0.592137	TRUE	0.567785	TRUE	3	20	1	77.8166	84.2271			N	N	Y
D3	Sham	IL-1B	UNKNOWN	SYBR	None	1.50748	1.07776	2.10853	26.3	26.3868	0.0960983		12.0756	0.174359			-0.592137	TRUE	0.567785	TRUE	3	20	1	77.8206	84.2289			N	N	Y
D4	SCI	IL-1B	UNKNOWN	SYBR	None	50.1604	36.9582	68.0787	23.417	23.3314	0.268927		8.26156	0.158712			-5.64848	TRUE	0.247775	TRUE	3	19	1	82.8867				N	N
D5	SCI	IL-1B	UNKNOWN	SYBR	None	50.1604	36.9582	68.0787	23.547	23.3314	0.268927		8.26156	0.158712			-5.64848	TRUE	0.247775	TRUE	3	19	1	82.8937				N	N
D6	SCI	IL-1B	UNKNOWN	SYBR	None	50.1604	36.9582	68.0787	23.03	23.3314	0.268927		8.26156	0.158712			-5.64848	TRUE	0.247775	TRUE	3	18	1	82.8937				N	N
D7	SCI+TMT	IL-1B	UNKNOWN	SYBR	None	15.2534	8.77848	26.5042	25.1374	24.8366	0.270956		9.97897	0.28709			-3.93106	TRUE	0.247775	TRUE	3	20	1	82.7376				N	N
D8	SCI+TMT	IL-1B	UNKNOWN	SYBR	None	15.2534	8.77848	26.5042	24.6115	24.8366	0.270956		9.97897	0.28709			-3.93106	TRUE	0.247775	TRUE	3	20	1	82.7447				N	N
D9	SCI+TMT	IL-1B	UNKNOWN	SYBR	None	15.2534	8.77848	26.5042	24.761	24.8366	0.270956		9.97897	0.28709			-3.93106	TRUE	0.247775	TRUE	3	20	1	82.7447				N	N
Analysis Type	Singleplex
Endogenous Control	GD
RQ Min/Max Confidence Level	95.0
Reference Sample	CK

## Sheet: 3
Experiment Run End Time	2021-03-24 20:50:10 PM PDT
Instrument Type	steponeplus
Passive Reference	ROX
Well	Sample Name	Target Name	Task	Reporter	Quencher	RQ	RQ Min	RQ Max	Cт	Cт Mean	Cт SD	ΔCт	ΔCт Mean	ΔCт SE	HK Control ΔCт Mean	HK Control ΔCт SE	ΔΔCт	Automatic Ct Threshold	Ct Threshold	Automatic Baseline	Baseline Start	Baseline End	Efficiency	Tm1	Tm2	Tm3	Comments	HIGHSD	OUTLIERRG
A1	Sham	GD	UNKNOWN	SYBR	None				15.4118	15.0862	0.293429							TRUE	0.474324	TRUE	3	10	1	82.2964				N	N
A2	Sham	GD	UNKNOWN	SYBR	None				15.0046	15.0862	0.293429							TRUE	0.474324	TRUE	3	10	1	82.2976				N	N
A3	Sham	GD	UNKNOWN	SYBR	None				14.8422	15.0862	0.293429							TRUE	0.474324	TRUE	3	9	1	82.2976				N	N
A4	SCI	GD	UNKNOWN	SYBR	None				15.1906	15.1931	0.00965949							TRUE	0.474324	TRUE	3	9	1	82.2939				N	N
A5	SCI	GD	UNKNOWN	SYBR	None				15.2038	15.1931	0.00965949							TRUE	0.474324	TRUE	3	10	1	82.2939				N	N
A6	SCI	GD	UNKNOWN	SYBR	None				15.185	15.1931	0.00965949							TRUE	0.474324	TRUE	3	9	1	82.4395				N	N
A7	SCI+TMT	GD	UNKNOWN	SYBR	None				14.979	14.9998	0.0452419							TRUE	0.474324	TRUE	3	9	1	82.4395				N	N
A8	SCI+TMT	GD	UNKNOWN	SYBR	None				15.0517	14.9998	0.0452419							TRUE	0.474324	TRUE	3	10	1	82.2976				N	N
A9	SCI+TMT	GD	UNKNOWN	SYBR	None				14.9687	14.9998	0.0452419							TRUE	0.474324	TRUE	3	10	1	82.2976				N	N
B1	Sham	TNF	UNKNOWN	SYBR	None	0.682937	0.62418	0.747226	27.8597	27.8834	0.0206091		12.6659	0.0467471			0.550175	TRUE	0.387145	TRUE	3	22	1	83.1882				N	N
B2	Sham	TNF	UNKNOWN	SYBR	None	0.682937	0.62418	0.747226	27.8975	27.8834	0.0206091		12.6659	0.0467471			0.550175	TRUE	0.387145	TRUE	3	23	1	83.1882				N	N
B3	Sham	TNF	UNKNOWN	SYBR	None	0.682937	0.62418	0.747226	27.893	27.8834	0.0206091		12.6659	0.0467471			0.550175	TRUE	0.387145	TRUE	3	23	1	83.1847				N	N
B4	SCI	TNF	UNKNOWN	SYBR	None	1.73191	1.44394	2.07731	26.5702	26.3932	0.153426		11.3234	0.0944922			-0.792363	TRUE	0.387145	TRUE	3	21	1	82.8925				N	N
B5	SCI	TNF	UNKNOWN	SYBR	None	1.73191	1.44394	2.07731	26.2982	26.3932	0.153426		11.3234	0.0944922			-0.792363	TRUE	0.387145	TRUE	3	21	1	82.8937				N	N
B6	SCI	TNF	UNKNOWN	SYBR	None	1.73191	1.44394	2.07731	26.3112	26.3932	0.153426		11.3234	0.0944922			-0.792363	TRUE	0.387145	TRUE	3	21	1	82.8937				N	N
C7	SCI+TMT	TNF	UNKNOWN	SYBR	None	1.32681	1.02955	1.70989	27.1104	27.1588	0.187769		11.7078	0.131803			-0.407963	TRUE	0.387145	TRUE	3	21	1	83.1899				N	N
C8	SCI+TMT	TNF	UNKNOWN	SYBR	None	1.32681	1.02955	1.70989	26.9999	27.1588	0.187769		11.7078	0.131803			-0.407963	TRUE	0.387145	TRUE	3	21	1	83.1899				N	N
C9	SCI+TMT	TNF	UNKNOWN	SYBR	None	1.32681	1.02955	1.70989	27.366	27.1588	0.187769		11.7078	0.131803			-0.407963	TRUE	0.387145	TRUE	3	22	1	83.0415				N	N
C1	Sham	IL-6	UNKNOWN	SYBR	None	0.682937	0.62418	0.747226	27.8597	27.8834	0.0206091		12.6659	0.0467471			0.550175	TRUE	0.387145	TRUE	3	22	1	83.1882				N	N
C2	Sham	IL-6	UNKNOWN	SYBR	None	0.682937	0.62418	0.747226	27.8975	27.8834	0.0206091		12.6659	0.0467471			0.550175	TRUE	0.387145	TRUE	3	23	1	83.1882				N	N
C3	Sham	IL-6	UNKNOWN	SYBR	None	0.682937	0.62418	0.747226	27.893	27.8834	0.0206091		12.6659	0.0467471			0.550175	TRUE	0.387145	TRUE	3	23	1	83.1847				N	N
D10	SCI	TNF	UNKNOWN	SYBR	None	1.2863	1.17926	1.40307	26.736	26.7523	0.0637856		11.7525	0.0451495			-0.363231	TRUE	0.387145	TRUE	3	21	1	82.8925				N	N
D11	SCI	IL-6	UNKNOWN	SYBR	None	1.2863	1.17926	1.40307	26.6983	26.7523	0.0637856		11.7525	0.0451495			-0.363231	TRUE	0.387145	TRUE	3	22	1	82.8937				N	N
D12	SCI	IL-6	UNKNOWN	SYBR	None	1.2863	1.17926	1.40307	26.8227	26.7523	0.0637856		11.7525	0.0451495			-0.363231	TRUE	0.387145	TRUE	3	21	1	82.8937				N	N
C7	SCI+TMT	IL-6	UNKNOWN	SYBR	None	1.32681	1.02955	1.70989	27.1104	27.1588	0.187769		11.7078	0.131803			-0.407963	TRUE	0.387145	TRUE	3	21	1	83.1899				N	N
C8	SCI+TMT	IL-6	UNKNOWN	SYBR	None	1.32681	1.02955	1.70989	26.9999	27.1588	0.187769		11.7078	0.131803			-0.407963	TRUE	0.387145	TRUE	3	21	1	83.1899				N	N
C9	SCI+TMT	IL-6	UNKNOWN	SYBR	None	1.32681	1.02955	1.70989	27.366	27.1588	0.187769		11.7078	0.131803			-0.407963	TRUE	0.387145	TRUE	3	22	1	83.0415				N	N
D1	Sham	IL-1B	UNKNOWN	SYBR	None	5.5673	1.99495	15.5367	27.7931	26.9118	0.818132		10.8019	0.533282			-2.47698	TRUE	0.503742	TRUE	3	22	1	83.4838				Y	N	N
D2	Sham	IL-1B	UNKNOWN	SYBR	None	5.5673	1.99495	15.5367	26.7657	26.9118	0.818132		10.8019	0.533282			-2.47698	TRUE	0.503742	TRUE	3	22	1	83.1848				Y	N	N
D3	Sham	IL-1B	UNKNOWN	SYBR	None	5.5673	1.99495	15.5367	26.1766	26.9118	0.818132		10.8019	0.533282			-2.47698	TRUE	0.503742	TRUE	3	20	1	83.3339				Y	N	N
D4	SCI	IL-1B	UNKNOWN	SYBR	None	21.2997	18.0619	25.118	24.5828	24.7147	0.126063		9.49727	0.0856796			-4.41276	TRUE	0.247775	TRUE	3	20	1	82.8918				N	N
D5	SCI	IL-1B	UNKNOWN	SYBR	None	21.2997	18.0619	25.118	24.8339	24.7147	0.126063		9.49727	0.0856796			-4.41276	TRUE	0.247775	TRUE	3	20	1	82.7428				N	N
D6	SCI	IL-1B	UNKNOWN	SYBR	None	21.2997	18.0619	25.118	24.7275	24.7147	0.126063		9.49727	0.0856796			-4.41276	TRUE	0.247775	TRUE	3	20	1	82.7434				N	N
D7	SCI+TMT	IL-1B	UNKNOWN	SYBR	None	4.12435	2.69556	6.31046	25.8205	25.5458	0.254063		11.2347	0.220995			-2.04417	TRUE	0.503742	TRUE	3	21	1	83.4817				N	N	N
D8	SCI+TMT	IL-1B	UNKNOWN	SYBR	None	4.12435	2.69556	6.31046	25.4977	25.5458	0.254063		11.2347	0.220995			-2.04417	TRUE	0.503742	TRUE	3	20	1	83.3348				N	N	N
D9	SCI+TMT	IL-1B	UNKNOWN	SYBR	None	4.12435	2.69556	6.31046	25.3193	25.5458	0.254063		11.2347	0.220995			-2.04417	TRUE	0.503742	TRUE	3	20	1	83.3348				N	N	N
Analysis Type	Singleplex
Endogenous Control	GD
RQ Min/Max Confidence Level	95.0
Reference Sample	CK
