# Supplementary material for: LncRNA/miRNA/mRNA ceRNA network analysis in spinal cord injury rat with physical exercise therapy
Source: PeerJ. 2022 Jul 29;10:e13783. doi: 10.7717/peerj.13783 (PMC9341448; doi:10.7717/peerj.13783)
Supplement: Table S1 — Given data show the power value results at 10–100 depths according to the coefficient of variation of counts within each of the two groups. [file peerj-10-13783-s002.xlsx]

## Sheet: Sheet1
depth	Sham-vs-SCI(cv=0.0723)	Sham-vs-SCI+TMT(cv=0.0810)	SCI-vs-SCI+TMT(cv=0.0782)
10	2.70357	2.73784	2.72639
20	1.41894	1.4532	1.44175
30	0.990726	1.02499	1.01354
40	0.776621	0.810887	0.799434
50	0.648157	0.682424	0.670971
60	0.562515	0.596781	0.585329
70	0.501342	0.535608	0.524156
80	0.455462	0.489729	0.478276
90	0.419778	0.454044	0.442591
100	0.39123	0.425497	0.414044
