# Supplementary material for: LncRNA/miRNA/mRNA ceRNA network analysis in spinal cord injury rat with physical exercise therapy
Source: PeerJ. 2022 Jul 29;10:e13783. doi: 10.7717/peerj.13783 (PMC9341448; doi:10.7717/peerj.13783)
Supplement: Table S2 — Given data show the power value results at 10–100 depths according to the coefficient of variation of counts within each of the two groups. [file peerj-10-13783-s003.xlsx]

## Sheet: Sheet1
depth	Sham-vs-SCI(cv=0.0723)	Sham-vs-TMT(cv=0.0810)	SCI-vs-SCI+TMT(cv=0.0782)
10	3.43807	3.48165	3.46709
20	1.80443	1.84801	1.83344
30	1.25988	1.30346	1.2889
40	0.987611	1.03119	1.01662
50	0.824247	0.867823	0.853259
60	0.715338	0.758914	0.744349
70	0.637545	0.681121	0.666557
80	0.579201	0.622777	0.608213
90	0.533822	0.577398	0.562834
100	0.497519	0.541095	0.52653
