# Supplementary material for: LncRNA/miRNA/mRNA ceRNA network analysis in spinal cord injury rat with physical exercise therapy
Source: PeerJ. 2022 Jul 29;10:e13783. doi: 10.7717/peerj.13783 (PMC9341448; doi:10.7717/peerj.13783)
Supplement: Table S3 — Given data show the power value results at 10–100 depths according to the coefficient of variation of counts within each of the two groups. [file peerj-10-13783-s004.xlsx]

## Sheet: Sheet1
depth	Sham-vs-SCI(cv=0.0723)	Sham-vs-SCI+TMT(cv=0.0810)	SCI-vs-SCI+TMT(cv=0.0782)
10	4.6026	4.66094	4.64144
20	2.41562	2.47396	2.45446
30	1.68663	1.74496	1.72547
40	1.32213	1.38047	1.36097
50	1.10343	1.16177	1.14227
60	0.957634	1.01597	0.996473
70	0.853492	0.911828	0.892331
80	0.775385	0.833721	0.814224
90	0.714636	0.772972	0.753475
100	0.666036	0.724372	0.704875
