# Supplementary material for: LncRNA/miRNA/mRNA ceRNA network analysis in spinal cord injury rat with physical exercise therapy
Source: PeerJ. 2022 Jul 29;10:e13783. doi: 10.7717/peerj.13783 (PMC9341448; doi:10.7717/peerj.13783)
Supplement: Table S4 [file peerj-10-13783-s005.xlsx]

## Sheet: ceRNA
miRNA	source
novel-m0172-3p	ENSRNOG00000050864
miR-4443-x	ENSRNOG00000000879
miR-4510-x	ENSRNOG00000000879
miR-4510-x	ENSRNOG00000014297
novel-m0090-5p	ENSRNOG00000050864
novel-m0094-5p	ENSRNOG00000050864
novel-m0095-5p	ENSRNOG00000050864
novel-m0097-5p	ENSRNOG00000050864
novel-m0099-5p	ENSRNOG00000050864
novel-m0102-5p	ENSRNOG00000050864
novel-m0106-5p	ENSRNOG00000050864
novel-m0109-5p	ENSRNOG00000050864
miR-6325-y	ENSRNOG00000014297
miR-1224-y	ENSRNOG00000009411
miR-1224-y	ENSRNOG00000009411
miR-8117-y	ENSRNOG00000009411
miR-421-x	ENSRNOG00000008249
miR-6325-y	ENSRNOG00000008249
rno-miR-193b-5p	ENSRNOG00000015670
rno-miR-487b-5p	ENSRNOG00000003392
miR-329-x	ENSRNOG00000015576
miR-4443-x	MSTRG.18736.1
miR-4443-x	MSTRG.12598.1
miR-4510-x	MSTRG.1451.1
miR-4510-x	MSTRG.12598.1
miR-4510-x	MSTRG.2483.2
miR-4510-x	MSTRG.10986.1
miR-4510-x	MSTRG.8085.2
miR-4510-x	MSTRG.17413.3
miR-4510-x	MSTRG.19470.3
miR-4510-x	MSTRG.19048.1
miR-4510-x	ENSRNOT00000075902
miR-4510-x	ENSRNOT00000076000
miR-4510-x	MSTRG.1747.1
miR-4510-x	ENSRNOT00000015084
miR-4510-x	MSTRG.12996.1
miR-4510-x	MSTRG.33.2
novel-m0090-5p	MSTRG.2838.2
novel-m0090-5p	MSTRG.3142.3
novel-m0090-5p	MSTRG.19821.1
novel-m0090-5p	MSTRG.18736.1
novel-m0090-5p	ENSRNOT00000015084
novel-m0090-5p	MSTRG.17839.2
novel-m0090-5p	MSTRG.18910.6
novel-m0090-5p	MSTRG.1451.1
novel-m0090-5p	MSTRG.12598.1
novel-m0090-5p	MSTRG.19204.13
novel-m0090-5p	MSTRG.17976.1
novel-m0090-5p	MSTRG.8085.2
novel-m0090-5p	MSTRG.8083.1
novel-m0090-5p	MSTRG.2838.2
novel-m0090-5p	MSTRG.3142.3
novel-m0090-5p	MSTRG.19821.1
novel-m0090-5p	MSTRG.18736.1
novel-m0090-5p	ENSRNOT00000015084
novel-m0090-5p	MSTRG.17839.2
novel-m0090-5p	MSTRG.18910.6
novel-m0090-5p	MSTRG.1451.1
novel-m0090-5p	MSTRG.12598.1
novel-m0090-5p	MSTRG.19204.13
novel-m0094-5p	MSTRG.12598.1
novel-m0094-5p	MSTRG.19204.13
novel-m0094-5p	MSTRG.17976.1
novel-m0094-5p	MSTRG.8085.2
novel-m0094-5p	MSTRG.8083.1
novel-m0094-5p	MSTRG.2838.2
novel-m0094-5p	MSTRG.3142.3
novel-m0094-5p	MSTRG.19821.1
novel-m0094-5p	MSTRG.18736.1
novel-m0094-5p	ENSRNOT00000015084
novel-m0094-5p	MSTRG.17839.2
novel-m0094-5p	MSTRG.18910.6
novel-m0094-5p	MSTRG.1451.1
novel-m0095-5p	MSTRG.1451.1
novel-m0095-5p	MSTRG.12598.1
novel-m0095-5p	MSTRG.19204.13
novel-m0095-5p	MSTRG.17976.1
novel-m0095-5p	MSTRG.8085.2
novel-m0095-5p	MSTRG.8083.1
novel-m0095-5p	MSTRG.2838.2
novel-m0095-5p	MSTRG.3142.3
novel-m0095-5p	MSTRG.19821.1
novel-m0095-5p	MSTRG.18736.1
novel-m0095-5p	ENSRNOT00000015084
novel-m0095-5p	MSTRG.17839.2
novel-m0095-5p	MSTRG.18910.6
novel-m0097-5p	MSTRG.18910.6
novel-m0097-5p	MSTRG.1451.1
novel-m0097-5p	MSTRG.12598.1
novel-m0097-5p	MSTRG.19204.13
novel-m0097-5p	MSTRG.17976.1
novel-m0097-5p	MSTRG.8085.2
novel-m0097-5p	MSTRG.8083.1
novel-m0097-5p	MSTRG.2838.2
novel-m0097-5p	MSTRG.3142.3
novel-m0097-5p	MSTRG.19821.1
novel-m0097-5p	MSTRG.18736.1
novel-m0097-5p	ENSRNOT00000015084
novel-m0097-5p	MSTRG.17839.2
novel-m0099-5p	ENSRNOT00000015084
novel-m0099-5p	MSTRG.17839.2
novel-m0099-5p	MSTRG.18910.6
novel-m0099-5p	MSTRG.1451.1
novel-m0099-5p	MSTRG.12598.1
novel-m0099-5p	MSTRG.19204.13
novel-m0099-5p	MSTRG.17976.1
novel-m0099-5p	MSTRG.8085.2
novel-m0099-5p	MSTRG.8083.1
novel-m0099-5p	MSTRG.2838.2
novel-m0099-5p	MSTRG.3142.3
novel-m0099-5p	MSTRG.19821.1
novel-m0099-5p	MSTRG.18736.1
novel-m0102-5p	MSTRG.18736.1
novel-m0102-5p	ENSRNOT00000015084
novel-m0102-5p	MSTRG.18910.6
novel-m0102-5p	MSTRG.1451.1
novel-m0102-5p	MSTRG.12598.1
novel-m0102-5p	MSTRG.19204.13
novel-m0102-5p	MSTRG.17976.1
novel-m0102-5p	MSTRG.8085.2
novel-m0102-5p	MSTRG.8083.1
novel-m0102-5p	MSTRG.2838.2
novel-m0102-5p	MSTRG.3142.3
novel-m0102-5p	MSTRG.19821.1
novel-m0106-5p	MSTRG.19821.1
novel-m0106-5p	MSTRG.18736.1
novel-m0106-5p	ENSRNOT00000015084
novel-m0106-5p	MSTRG.18910.6
novel-m0106-5p	MSTRG.1451.1
novel-m0106-5p	MSTRG.12598.1
novel-m0106-5p	MSTRG.19204.13
novel-m0106-5p	MSTRG.17976.1
novel-m0106-5p	MSTRG.8083.1
novel-m0106-5p	MSTRG.2838.2
novel-m0106-5p	MSTRG.3142.3
novel-m0109-5p	MSTRG.3142.3
novel-m0109-5p	MSTRG.19821.1
novel-m0109-5p	MSTRG.18736.1
novel-m0109-5p	ENSRNOT00000015084
novel-m0109-5p	MSTRG.18910.6
novel-m0109-5p	MSTRG.1451.1
novel-m0109-5p	MSTRG.12598.1
novel-m0109-5p	MSTRG.19204.13
novel-m0109-5p	MSTRG.17976.1
novel-m0109-5p	MSTRG.8085.2
novel-m0109-5p	MSTRG.8083.1
novel-m0109-5p	MSTRG.2838.2
miR-4510-x	MSTRG.19470.3
miR-4510-x	MSTRG.19048.1
miR-4510-x	ENSRNOT00000075902
miR-4510-x	ENSRNOT00000076000
miR-4510-x	MSTRG.1747.1
miR-4510-x	ENSRNOT00000015084
miR-4510-x	MSTRG.12996.1
miR-4510-x	MSTRG.33.2
miR-4510-x	MSTRG.1451.1
miR-4510-x	MSTRG.12598.1
miR-4510-x	MSTRG.2483.2
miR-4510-x	MSTRG.10986.1
miR-4510-x	MSTRG.8085.2
miR-4510-x	MSTRG.17413.3
miR-6325-y	MSTRG.17413.3
miR-6325-y	MSTRG.1989.3
miR-6325-y	MSTRG.19470.3
miR-6325-y	MSTRG.11223.1
miR-6325-y	MSTRG.14979.1
miR-6325-y	MSTRG.1747.1
miR-6325-y	ENSRNOT00000015084
miR-6325-y	MSTRG.12996.1
miR-6325-y	ENSRNOT00000085934
miR-6325-y	ENSRNOT00000081763
miR-6325-y	MSTRG.1451.1
miR-6325-y	MSTRG.19204.13
miR-1224-y	MSTRG.17976.1
miR-1224-y	MSTRG.2483.2
miR-1224-y	MSTRG.8085.2
miR-1224-y	MSTRG.1989.1
miR-1224-y	MSTRG.17413.3
miR-1224-y	MSTRG.1989.3
miR-1224-y	MSTRG.11223.1
miR-1224-y	MSTRG.19048.1
miR-1224-y	MSTRG.9743.2
miR-1224-y	MSTRG.9237.1
miR-1224-y	MSTRG.12996.1
miR-1224-y	MSTRG.1989.7
miR-1224-y	MSTRG.16014.1
miR-1224-y	MSTRG.14094.1
miR-1224-y	ENSRNOT00000089399
miR-1224-y	MSTRG.1451.1
miR-8117-y	MSTRG.17976.1
miR-8117-y	MSTRG.13292.3
miR-8117-y	MSTRG.10986.1
miR-8117-y	MSTRG.17413.3
miR-8117-y	MSTRG.2838.2
miR-8117-y	MSTRG.1882.1
miR-8117-y	MSTRG.14979.1
miR-8117-y	MSTRG.18736.1
miR-8117-y	MSTRG.12996.1
miR-8117-y	ENSRNOT00000080918
miR-8117-y	MSTRG.16014.1
miR-8117-y	MSTRG.18910.6
miR-8117-y	ENSRNOT00000092526
miR-8117-y	MSTRG.14369.2
miR-421-x	ENSRNOT00000089399
miR-421-x	MSTRG.10986.1
miR-421-x	MSTRG.4152.1
miR-421-x	ENSRNOT00000075902
miR-421-x	ENSRNOT00000076000
miR-421-x	MSTRG.14094.1
miR-6325-y	ENSRNOT00000085934
miR-6325-y	ENSRNOT00000081763
miR-6325-y	MSTRG.1451.1
miR-6325-y	MSTRG.19204.13
miR-6325-y	MSTRG.17413.3
miR-6325-y	MSTRG.1989.3
miR-6325-y	MSTRG.19470.3
miR-6325-y	MSTRG.11223.1
miR-6325-y	MSTRG.14979.1
miR-6325-y	MSTRG.1747.1
miR-6325-y	ENSRNOT00000015084
miR-6325-y	MSTRG.12996.1
rno-miR-193b-5p	ENSRNOT00000089399
rno-miR-193b-5p	MSTRG.13261.2
rno-miR-193b-5p	MSTRG.1451.1
rno-miR-193b-5p	MSTRG.12598.1
rno-miR-193b-5p	MSTRG.19204.13
rno-miR-193b-5p	ENSRNOT00000076843
rno-miR-193b-5p	MSTRG.17976.1
rno-miR-193b-5p	MSTRG.10986.1
rno-miR-193b-5p	MSTRG.8085.2
rno-miR-193b-5p	MSTRG.4152.1
rno-miR-193b-5p	MSTRG.3142.3
rno-miR-193b-5p	MSTRG.19821.1
rno-miR-193b-5p	MSTRG.9743.3
rno-miR-487b-5p	ENSRNOT00000075902
rno-miR-487b-5p	ENSRNOT00000076000
rno-miR-487b-5p	MSTRG.17839.2
rno-miR-487b-5p	MSTRG.16014.1
rno-miR-487b-5p	MSTRG.17413.3
rno-miR-487b-5p	MSTRG.11223.1
miR-329-x	MSTRG.19821.1
miR-329-x	ENSRNOT00000080918
miR-329-x	MSTRG.14369.2
miR-329-x	ENSRNOT00000086103
miR-329-x	MSTRG.10986.1
miR-329-x	MSTRG.19470.3

## Sheet: log2（FC）
miRNA	Log2（FC）	mRNA	Log（FC）	lncRNA	log2（FC）
miR-4443-x	3.0031	ENSRNOG00000000879	11.6707	MSTRG.18736.1	0.647119
miR-4510-x	1.44232	ENSRNOG00000050864	9.36632	MSTRG.12598.1	0.809435
novel-m0090-5p	1.25071	ENSRNOG00000014297	2.1307	MSTRG.1451.1	0.682359
novel-m0094-5p	1.25071	ENSRNOG00000009411	-3.73272	MSTRG.2483.2	-8.1964
novel-m0095-5p	1.25071	ENSRNOG00000008249	-1.94102	MSTRG.10986.1	2.41269
novel-m0097-5p	1.25071	ENSRNOG00000015670	0.921467	MSTRG.8085.2	1.13276
novel-m0099-5p	1.25071	ENSRNOG00000003392	-1.61099	MSTRG.17413.3	0.644264
novel-m0102-5p	1.25071	ENSRNOG00000015576	8.32193	MSTRG.19470.3	-0.841476
novel-m0106-5p	1.25071			MSTRG.19048.1	0.74
novel-m0109-5p	1.25071			ENSRNOT00000075902	0.604685
novel-m0172-3p	1.25071			ENSRNOT00000076000	0.604685
miR-4510-x	1.44232			MSTRG.1747.1	0.852632
miR-6325-y	-1.00207			ENSRNOT00000015084	-0.672157
miR-1224-y	-2.81636			MSTRG.12996.1	-2.92639
miR-8117-y	4.17051			MSTRG.33.2	10.0813
miR-421-x	-5.0145			MSTRG.2838.2	0.898338
miR-6325-y	-1.00207			MSTRG.3142.3	1.30023
rno-miR-193b-5p	-5.20594			MSTRG.19821.1	1.11314
rno-miR-487b-5p	-2.82799			MSTRG.17839.2	0.842644
miR-329-x	-2.14789			MSTRG.18910.6	-8.27612
				MSTRG.19204.13	-3.68816
				MSTRG.17976.1	-2.85717
				MSTRG.8083.1	1.01459
				MSTRG.1989.3	0.590293
				MSTRG.11223.1	-1.6065
				MSTRG.14979.1	-1.70507
				ENSRNOT00000085934	-8.6677
				ENSRNOT00000081763	0.692491
				MSTRG.1989.1	0.612171
				MSTRG.9743.2	-2.1375
				MSTRG.9237.1	-1.71961
				MSTRG.1989.7	-0.853537
				MSTRG.16014.1	0.589697
				MSTRG.14094.1	0.648657
				ENSRNOT00000089399	0.586862
				MSTRG.13292.3	-0.979269
				MSTRG.1882.1	-1.88354
				ENSRNOT00000080918	0.877744
				ENSRNOT00000092526	-1.06413
				MSTRG.14369.2	0.81263
				MSTRG.4152.1	0.619536
				MSTRG.13261.2	-1.24929
				ENSRNOT00000076843	-7.43741
				MSTRG.9743.3	-0.61903
				ENSRNOT00000086103	-9.73132
